# Supplementary material for: CCDC167 as a potential therapeutic target and regulator of cell cycle-related networks in breast cancer
Source: publisher site journal article supplement (doi:10.18632/aging.202382), 2021-01-10
Supplement: Supplementary file [file aging-v13i3-202382-supplementary-material-SD1.pdf]

**SUPPLEMENTARY FIGURES**

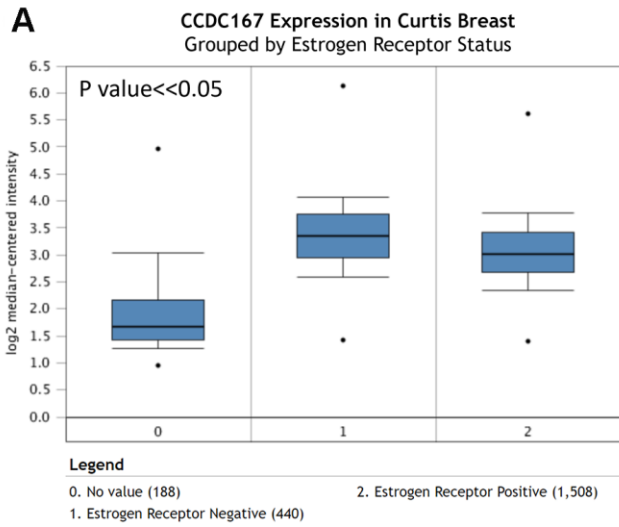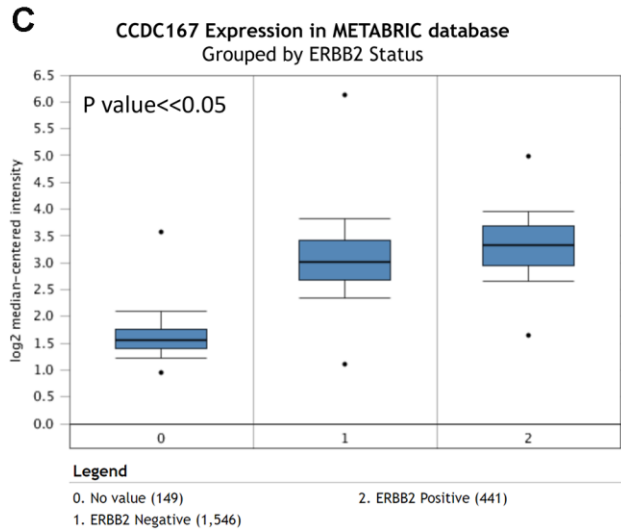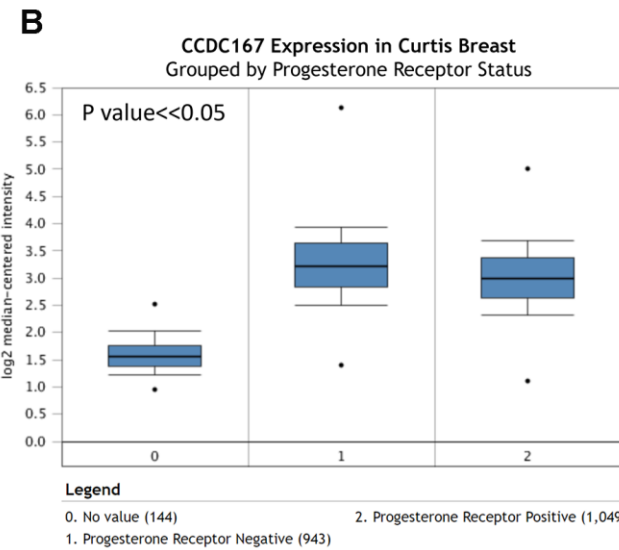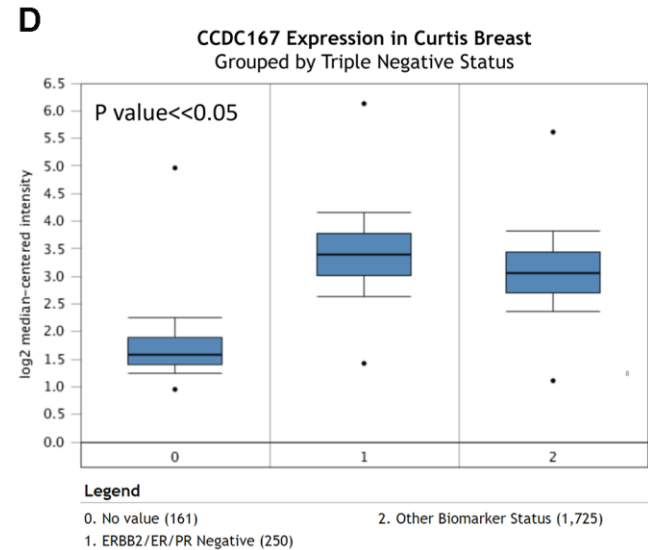

**Supplementary Figure 1.** Coiled-coil domain-containing protein 167 (CCDC167) expression in the METABRIC database (A) CCDC167 expression in estrogen receptor-positive (ER<sup>+</sup>) breast cancer patients, (B) CCDC167 expression in progesterone receptor-positive (PR<sup>+</sup>) breast cancer patients, (C) CCDC167 expression in ERBB2<sup>+</sup> (human epidermal growth factor receptor (HER)-2-enriched) breast cancer patients, and (D) CCDC167 expression in triple-negative breast cancer (TNBC) patients.

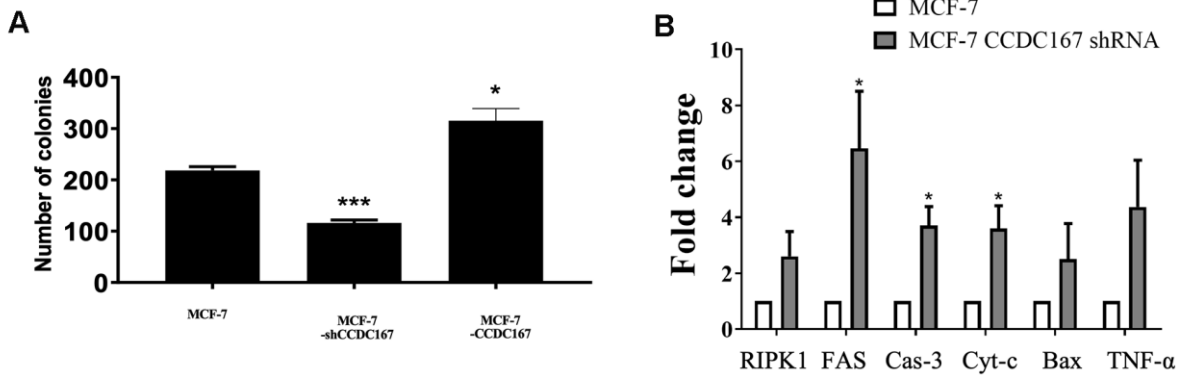

**Supplementary Figure 2.** Knockdown of coiled-coil domain-containing protein 167 (CCDC167) attenuates cellular growth by regulating cell cycle-related genes (A) Proliferation rates of the MCF-7 control cell line and shCCDC167-knockdown and CCDC167-overexpressing cells were determined by a colony-formation assay. (B) Knockdown of CCDC167 in MCF-7 cells increased apoptosis and necrosis-related gene expressions according to a qPCR.

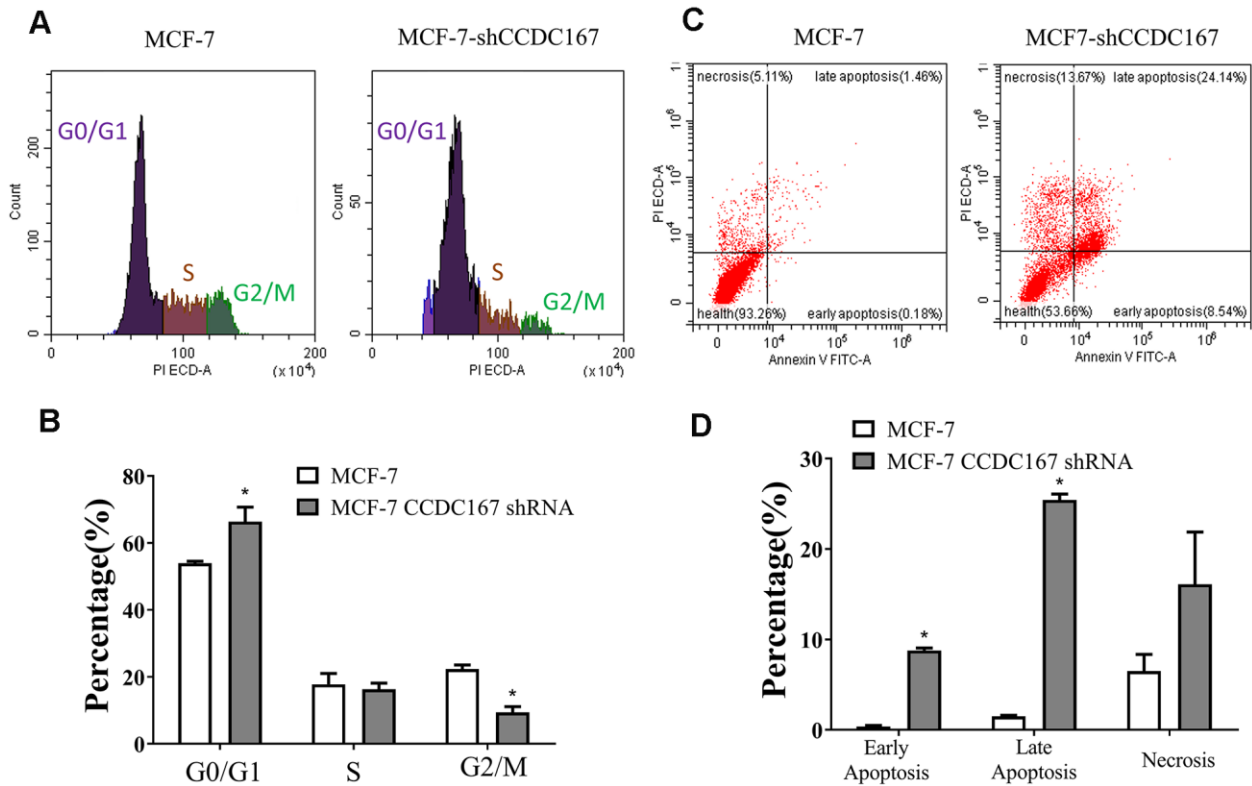

**Supplementary Figure 3. Flow cytometric analysis of the cell cycle distribution and apoptosis.** (A) The increment in the proportion of cells arrested in the G<sub>0</sub>/G<sub>1</sub> phase after knockdown of coiled-coil domain-containing protein 167 (CCDC167) in MCF7 cells. (B) Statistical data of the cell cycle distribution from flow cytometry. (C) Knockdown of CCDC167 initiated early and late apoptotic states and necrotic states compared to the control group. (D) Statistical data of the apoptosis status from flow cytometry.

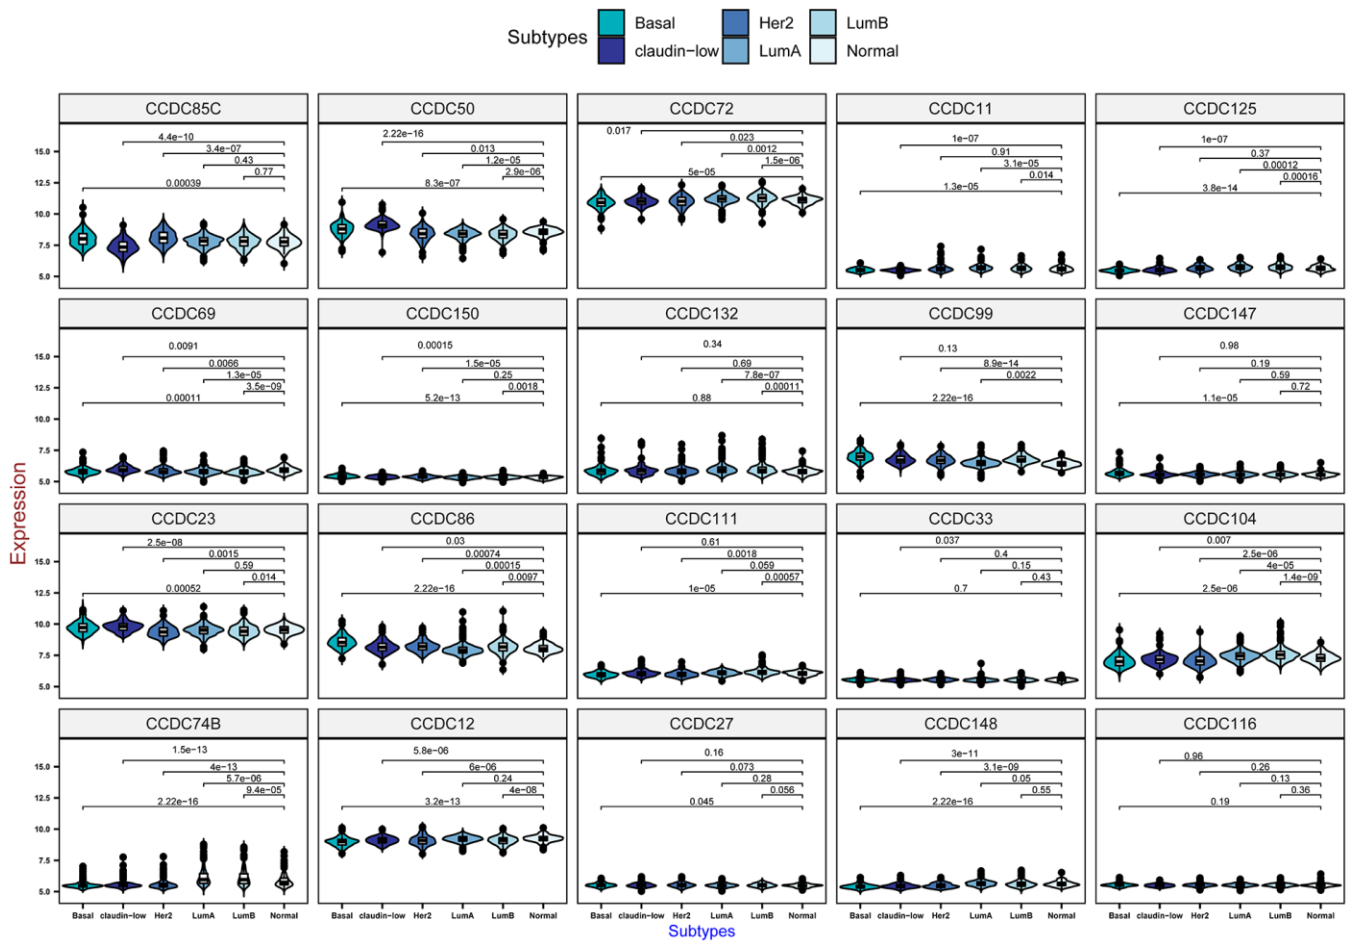

**Supplementary Figure 4. Coiled-coil domain-containing protein (CCDC) family gene expressions in the METABRIC database.** Comparison of members of the CCDC family in different subtypes of breast cancer (part-1).

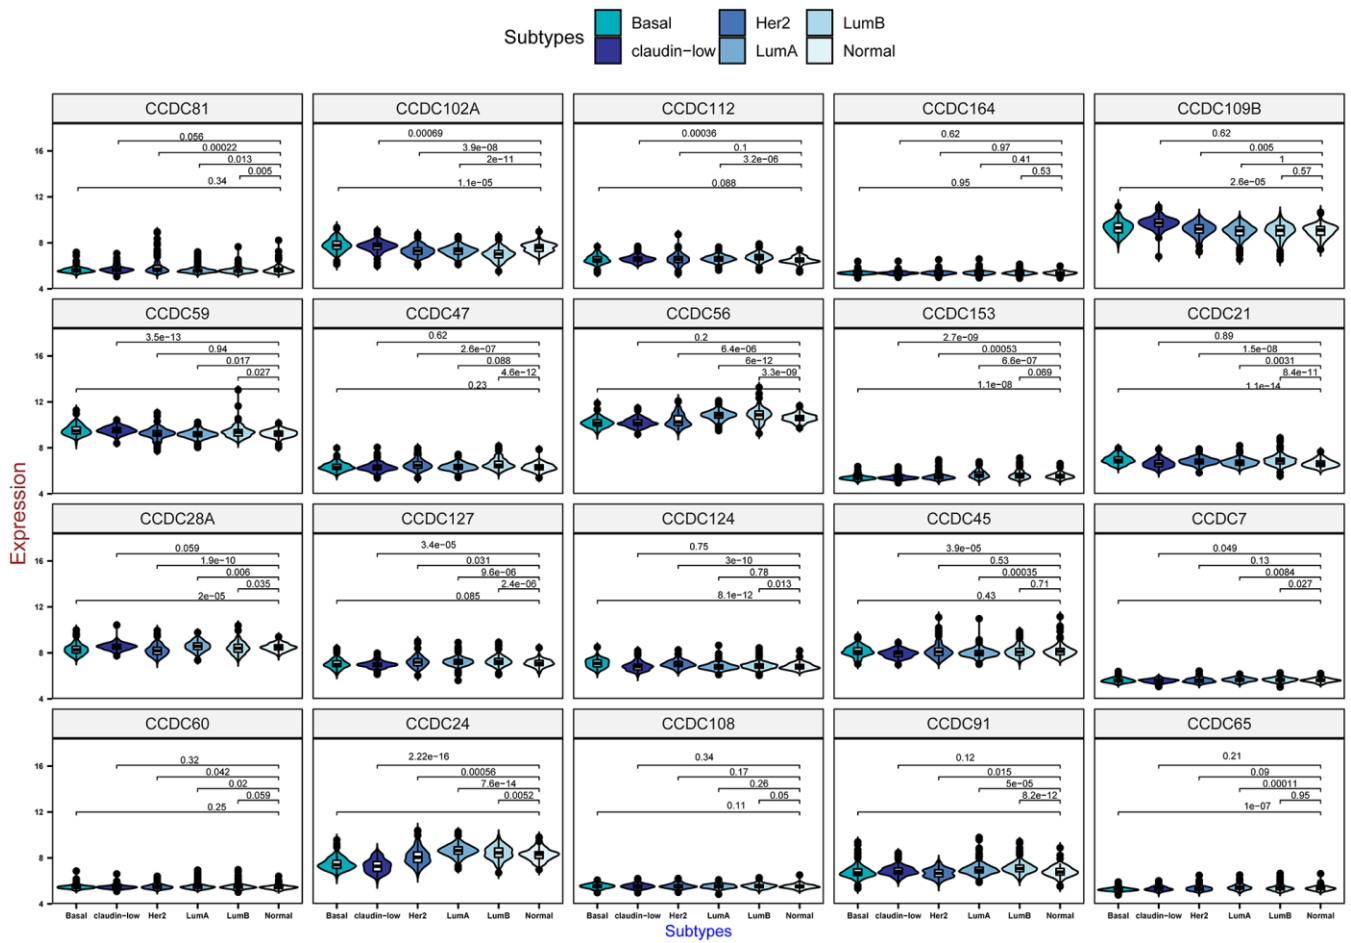

**Supplementary Figure 5. The CCDC family gene expression in METABRIC database.** Comparison of members of CCDC family in different subtypes of breast cancer (part-2).

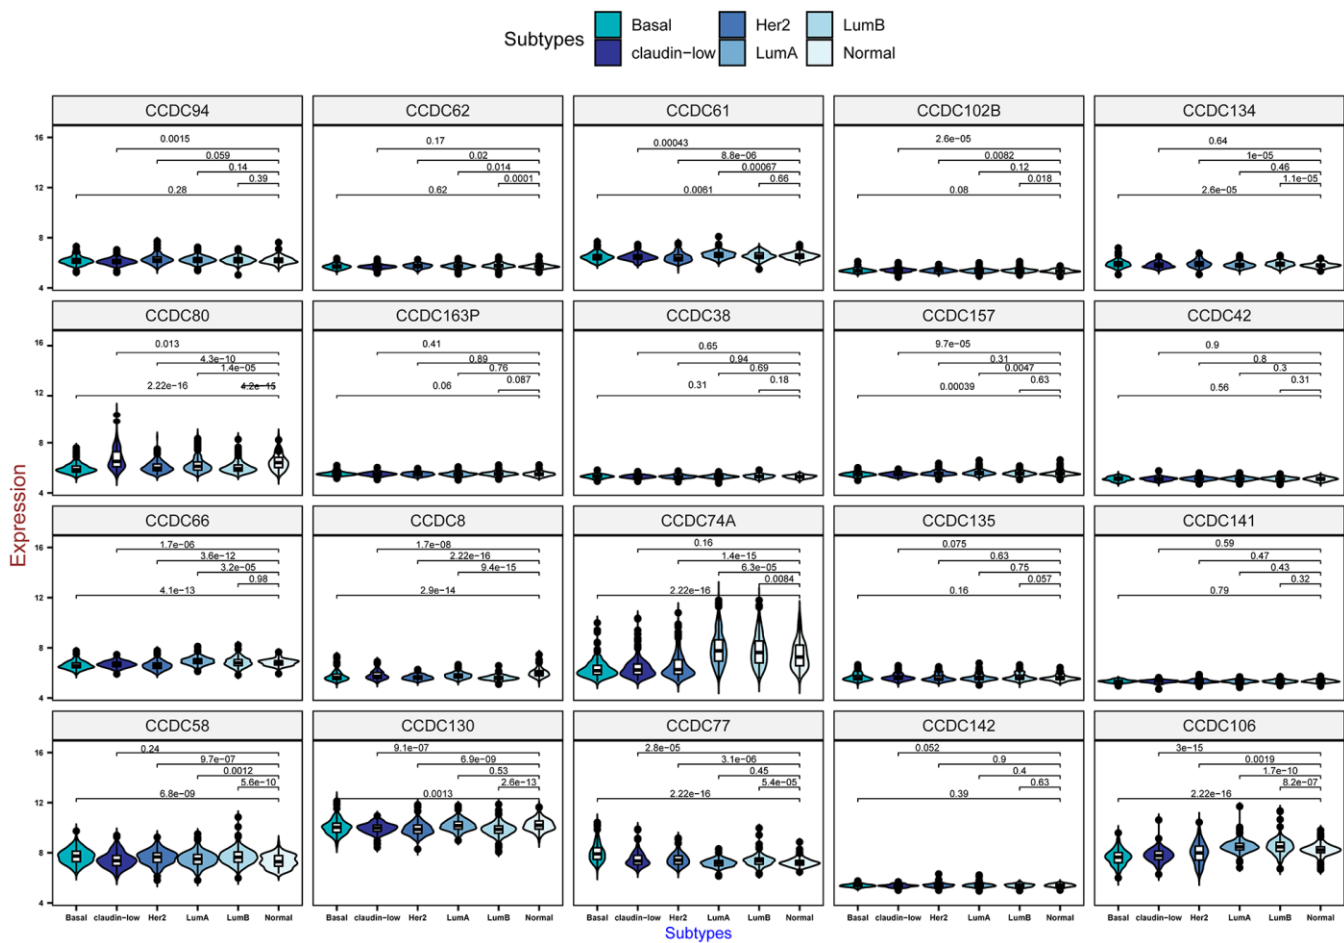

**Supplementary Figure 6. The CCDC family gene expression in METABRIC database.** Comparison of members of CCDC family in different subtypes of breast cancer (part-3).

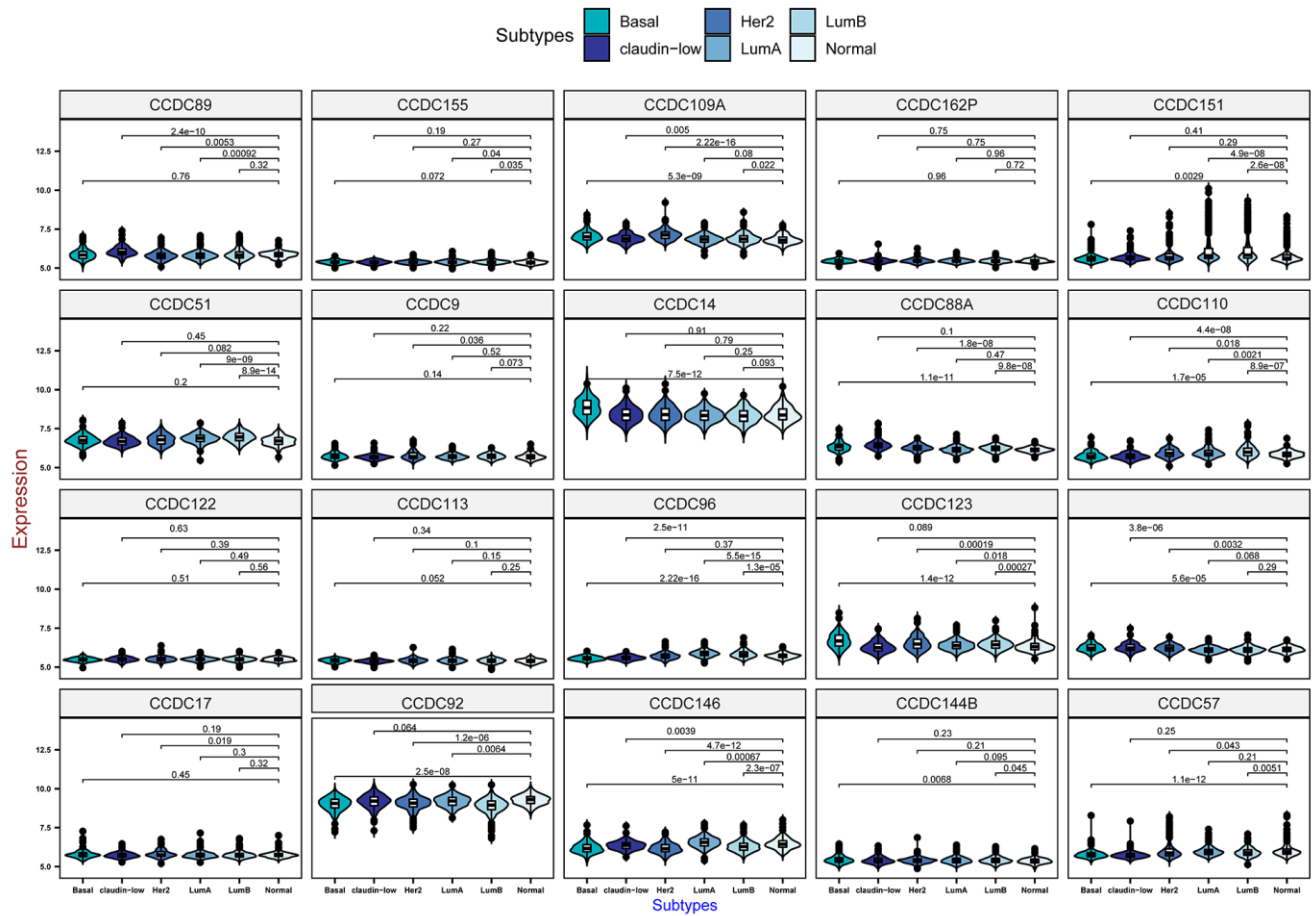

**Supplementary Figure 7. The CCDC family gene expression in METABRIC database.** Comparison of members of CCDC family in different subtypes of breast cancer (part-4).

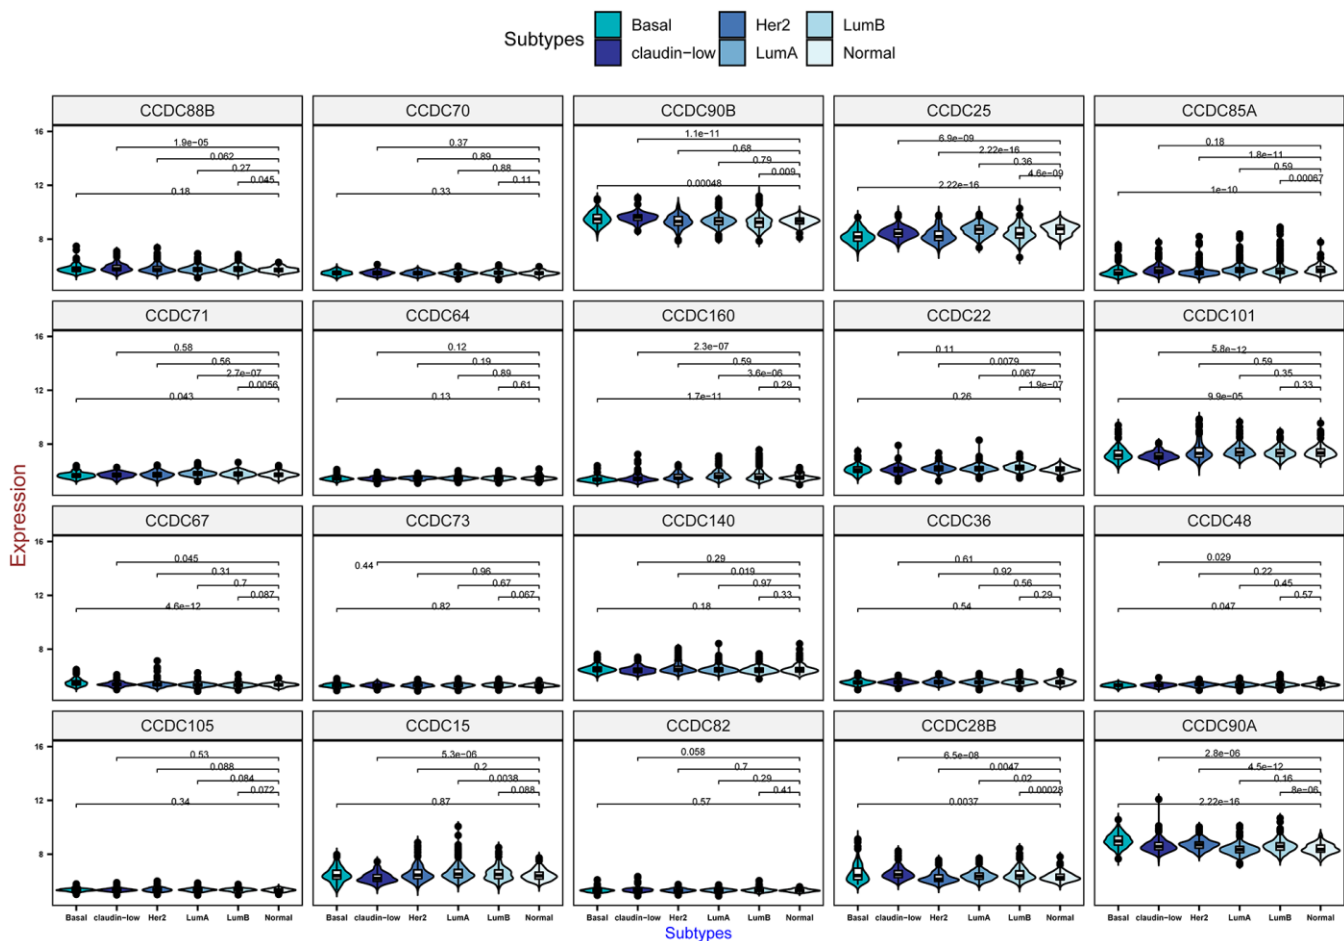

**Supplementary Figure 8. The CCDC family gene expression in METABRIC database. Comparison of members of CCDC family in different subtypes of breast cancer (part-5).**

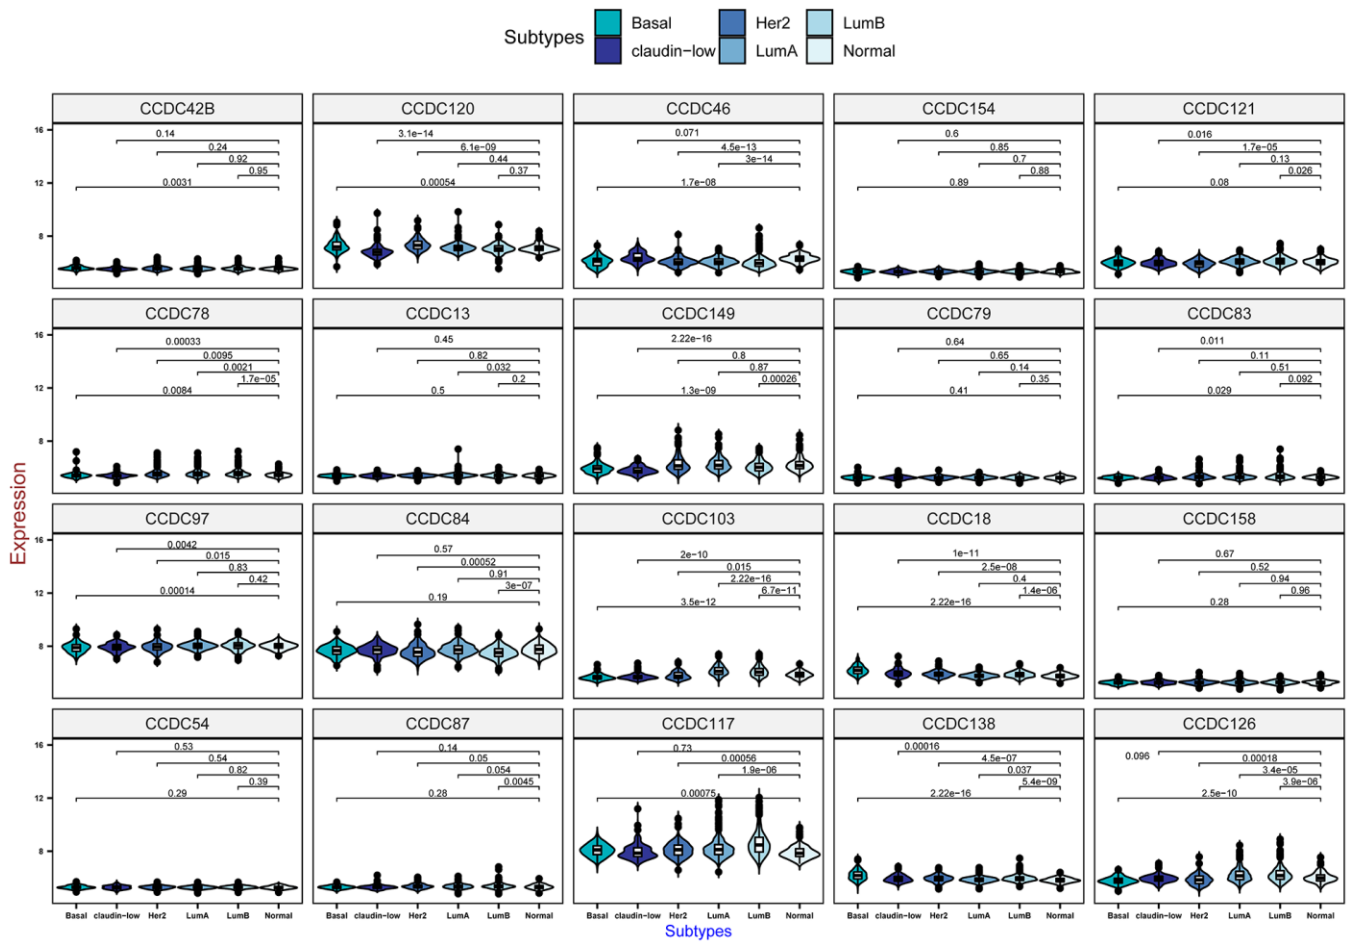

**Supplementary Figure 9. The CCDC family gene expression in METABRIC database.** Comparison of members of CCDC family in different subtypes of breast cancer (part-6).



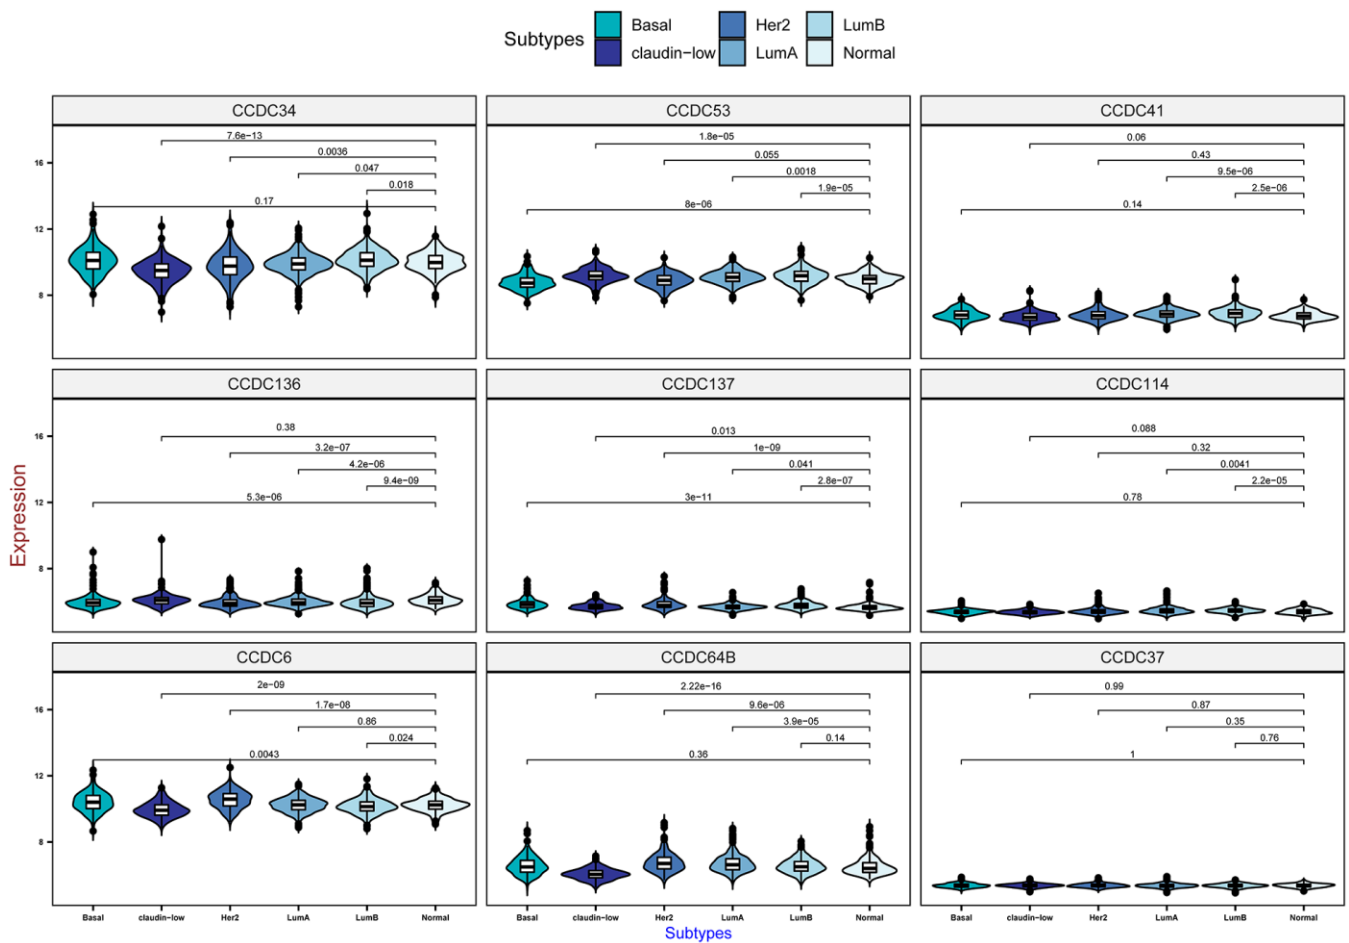

**Supplementary Figure 10. The CCDC family gene expression in METABRIC database.** Comparison of members of CCDC family in different subtypes of breast cancer (part-7).
